# Supplementary material for: An anion structure–activity relationship of imidazolium-based synthetic transporters
Source: Royal Society of Chemistry journal article supplement (doi:10.1039/c2md20107k), 2012-01-01
Supplement: c2md20107k.pdf [file c2md20107k.pdf]

## SUPPORTING INFORMATION

### **Anion Structure-Activity Relationship of Imidazolium-based Synthetic Transporters**

**Claude-Rosny Elie,<sup>a</sup> Mathieu Charbonneau<sup>b</sup> and Andreea R. Schmitzer<sup>\*a</sup>**

*Département de Chimie, Université de Montréal*

*CP 6128 succursale centre ville 2900 Edouard Montpetit H3C3J&, Montréal,*

*Québec, Canada*

## Experimental section.

**General.** 4-iodobenzoic acid, borane in tetrahydrofuran (BH<sub>3</sub> in THF), phosphorus tribromide (PBr<sub>3</sub>) were obtained from Aldrich. Tetrahydrofuran (THF), dichloromethane (DCM), acetonitrile (CH<sub>3</sub>CN), hexane and ethyl acetate (EtOAc) were purchased from EMD. <sup>1</sup>H- and <sup>13</sup>C-NMR spectra were recorded on a Bruker spectrometer at 300 and 75 MHz, respectively, in the indicated solvent. Chemical shifts are reported in ppm with internal reference to TMS. High-resolution mass spectra (HRMS) were recorded on a LC-MSD-Tof instrument from Agilent technologies in positive electrospray mode in general. Either protonated molecular ions (M+H)<sup>+</sup> or silver adducts (M+Ag)<sup>+</sup> were used for empirical formula confirmation. NMR spectra, for the complexation studies, were recorded on a Bruker spectrometer at 300 MHz. Phospholipids used to prepare liposomes were purchased from Avanti Polar Lipids. Size-exclusion chromatography was performed using Sephadex G-25. Fluorescent dyes HPTS and Lucigenin were purchased from Fluka and Molecular Probes, respectively. Liposome fluorimetric assays were recorded using a Varian Cary Eclipse Fluorescence spectrophotometer.

**Synthesis.** The synthesis and characterization of compound **1** were previously reported<sup>11</sup>. The compounds **2-4** have been synthesized by a counter ion change of compound **1** (Scheme 3). The (*N,N'*-Diphenylethynylbenzyl)imidazolium bromide salt (**1**) has been synthesized from imidazole using (4-phenylethynyl)benzyl bromide (**d**) in THF at 70°C during 12 hours (Scheme 2). The (4-phenylethynyl)benzyl bromide (**c**) has been obtained from 4-iodobenzoic acid (**3a**) reduced to 4-iodobenzyl alcohol (**b**) using BH<sub>3</sub> in THF overnight at room temperature, then to react with benzylacetylene using PPh<sub>3</sub>, PdCl<sub>2</sub>(PPh<sub>3</sub>)<sub>2</sub>, CuI in dry THF with Et<sub>3</sub>N overnight at 50 °C (Scheme 1).

**4-Iodobenzyl alcohol (b)** : 4-Iodobenzoic acid (0.02 mol) diluted in 40 mL THF was added to 40 mL of a solution of BH<sub>3</sub> in THF 1.0 M and the mixture was stirred overnight at room temperature. The reaction was quenched with 100 mL of HCl 2 N and extracted with 3 × 140 mL of DCM. The combined organic layers

were washed with 2 × 80 mL of NaHCO<sub>3</sub> saturated then 2 × 80 mL of Brine and dried over MgSO<sub>4</sub>. The solvent was removed under reduced pressure to give the pure product as a white solid in a 99 % isolated yield. Mp 68 – 70 °C. <sup>1</sup>H NMR (300 MHz, CDCl<sub>3</sub>) δ 7.65 (d, 2H, J = 8.2 Hz), 7.06 (d, 2H, J = 8.0 Hz), 4.58 (s, 2H), 2.04 (b, 1H). <sup>13</sup>C NMR (75 MHz, CDCl<sub>3</sub>) δ 140.3, 137.4, 128.7, 92.9, 64.4. HRMS (ESI) calcd for C<sub>7</sub>H<sub>7</sub>AgIO<sup>+</sup> [M+Ag]<sup>+</sup>: 340.8587, found 340.8591.

**(4-Phenylethynyl)benzyl alcohol (c)** : To a carefully degassed solution of 4-iodobenzyl alcohol **b** (4.3 mmol), PPh<sub>3</sub> (0.085 mmol), and PdCl<sub>2</sub>(PPh<sub>3</sub>)<sub>2</sub> (0.026 mmol) in 10 mL of dry THF and 5 mL of dry triethylamine was added CuI (0.085 mmol). The mixture was degassed for 5 min and a solution of phenylacetylene (4.3 mmol) in 2 mL of dry THF was added dropwise. The reaction was stirred overnight at 50 °C under nitrogen atmosphere. The mixture was added to 50 mL of ice water and the organic phase was recovered, dried over MgSO<sub>4</sub>. The solvent was removed under reduced pressure to give the pure product as a white solid in 99 % isolated yield. Mp. 118 – 120 °C. <sup>1</sup>H NMR (300 MHz, CDCl<sub>3</sub>) δ 7.54-7.50 (m, 4H), 7.37-7.24 (m, 5H), 4.66 (s, 2H), 2.00 (b, 1H). <sup>13</sup>C NMR (75 MHz, CDCl<sub>3</sub>) δ 140.9, 131.7, 131.5, 128.3, 128.2, 126.7, 123.1, 122.3, 89.3, 89.1, 64.8. HRMS (ESI) calcd for C<sub>15</sub>H<sub>13</sub>O<sup>+</sup> [M+H]<sup>+</sup>: 209.0961, found 209.0969.

**(4-Phenylethynyl)benzyl bromide (d)** : (4-Phenylethynyl)benzyl alcohol (**c**) (1.44 mmol) was dissolved in 5 mL of DCM. The mixture was put at 0 °C and phosphorus tribromide was added dropwise. Then the mixture was stirred 2 hours at 0 °C and the solvent was removed under reduced pressure. The product was purified by flash chromatography (Hexane/EtOAc, 60:40) to afford the compound **d** as a white solid in 100 % isolated yield. Mp 94 – 96 °C. <sup>1</sup>H NMR (300 MHz, CDCl<sub>3</sub>) δ 7.54-7.48 (m, 4H), 7.37-7.24 (m, 5H), 4.48 (s, 2H). <sup>13</sup>C NMR (75 MHz, CDCl<sub>3</sub>) δ 137.6, 131.9, 131.5, 129.0, 128.3, 128.2, 123.3, 122.9, 90.2, 88.8, 32.9. HRMS (ESI) calcd for C<sub>15</sub>H<sub>12</sub>Br<sup>+</sup> [M+H]<sup>+</sup>: 271.0117, found 271.0109.

**(N,N'-Diphenylethynylbenzyl)imidazolium bromide (1)** : 27.5 mg (0.40 mmol) of imidazole and 37.8 mg of sodium hydride (1.57 mmol) are diluted in 10 mL of THF. After 5 minutes at room temperature, 100 mg (0.40 mmol) of (4-

phenylethynyl)benzyl bromide **d** is added to the mixture. The solution is stirred at room temperature for 12 hrs and the solvent is removed in vacuo. 20 mL of water and 30 mL of DCM are added to the crude product. The organic phase is separated, washed with 2 x 20 mL of water and then dried on MgSO<sub>4</sub>. The solvent is removed in vacuo to yield 100 mg of the intermediate (4-Phényléthynyl)benzylimidazole. This compound is then used without further purification: 100 mg (0.47 mmol) of (4-phenylethynyl)benzylimidazole and 127 mg (0.47 mmol) of (4-phenylethynyl)benzyl bromide **d** are dissolved in 10 mL of THF. The mixture is stirred 12 hrs at 70°C and the resulting precipitate is filtered, washed with 10 mL of THF, and dried in vacuo. 134 mg of **1** were obtained. Yield 67 %. <sup>1</sup>H NMR (CD<sub>3</sub>OD, 400MHz): δ=7.71 (s, 2H), 7.62 (d, J=8.3 Hz, 4H), 7.51-7.56 (m, 4H), 7.46 (d, J=8.3 Hz, 4H), 7.37-7.42 (m, 6H), 7.38-7.42 (m, 2H), 5.48 ppm (s, 4H). <sup>13</sup>C NMR (CD<sub>3</sub>OD, 75 MHz): δ=134.6, 132.8, 132.0, 129.3, 129.2, 129.0, 125.2, 123.7, 123.5, 123.2, 90.9, 88.5, 53.3 ppm. HR-MS (ESI): m/z Calcd for C<sub>33</sub>H<sub>25</sub>N<sub>2</sub> [M-Br]<sup>+</sup>: 449.2012, found 449.2017.

**(N,N'-Diphenylethynylbenzyl)imidazolium Tetrafluoroborate (2)** : 100 mg (0,19 mmoles) of (N,N'-Diphenylethynylbenzyl)imidazolium boride are dissolved in a mixture of MeOH/ACN (50 :50). Then, 32 mg (0,29 mmoles) of NaBF<sub>4</sub> are added to 10 mL of methanol before being poured onto the solution containing the imidazolium salt. The resulting mixture is then brought to 80°C and stirred with a magnetic stir bar during 12 hours. After evaporating the solvent under reduced pressure, 40mL of distilled water are added to the powder obtained. The mixture is heated to 100°C for 12 hours under magnetic stirring, and then filtered on a fritted glass. The raw product is then dried at 80°C for 2 hours, in order to obtain 96 mg of a white powder (95% yield). <sup>1</sup>H NMR (400 MHz, CHLOROFORM-*d*) □ ppm 9.40 (s, 1 H), 7.87 (d, J=1.41 Hz, 2 H), 7.62 - 7.66 (m, 4 H), 7.53 - 7.59 (m, 4 H), 7.43 - 7.50 (m, 10 H), 5.49 (s, 4 H).

**(N,N'-Diphenylethynylbenzyl)imidazolium Hexafluorophosphate (3)** : 100 mg (0,19 mmoles) of (N,N'-Diphenylethynylbenzyl)imidazolium boride are dissolved in a mixture of MeOH/ACN (50 :50). Then, 46 mg (0,29 mmoles) of NH<sub>4</sub>PF<sub>6</sub> are added to 10 mL of methanol before being poured onto the solution containing the

imidazolium salt. The resulting mixture is then brought to 80°C and stirred with a magnetic stir bar during 12 hours. After evaporating the solvent under reduced pressure, 40mL of distilled water are added to the powder obtained. The mixture is heated to 100°C for 12 hours under magnetic stirring, and then filtered on a fritted glass. The raw product is then dried at 80°C for 2 hours, in order to obtain 113 mg of a white powder (99% yield). <sup>1</sup>H NMR (400 MHz, CHLOROFORM-*d*) □ ppm 9.40 (s, 1 H), 7.87 (d, *J*=1.41 Hz, 2 H), 7.62 - 7.66 (m, 4 H), 7.53 - 7.59 (m, 4 H), 7.43 - 7.50 (m, 10 H), 5.49 (s, 4 H).

**(*N,N'*-Diphenylethynylbenzyl)imidazolium Bistrifluorométhanesulfonimide (4)** : 100 mg (0,19 mmoles) of (*N,N'*-Diphenylethynylbenzyl)imidazolium boride are dissolved in a mixture of MeOH/ACN (50 :50). Then, 83 mg (0,29 mmoles) of LiNTf<sub>2</sub> are added to 10 mL of methanol before being poured onto the solution containing the imidazolium salt. The resulting mixture is then brought to 80°C and stirred with a magnetic stir bar during 12 hours. After evaporating the solvent under reduced pressure, 40mL of distilled water are added to the powder obtained. The mixture is heated to 100°C for 12 hours under magnetic stirring, and then filtered on a fritted glass. The raw product is then dried at 80°C for 2 hours, in order to obtain 138 mg of a white powder (99% yield). <sup>1</sup>H NMR (400 MHz, CHLOROFORM-*d*) □ ppm 9.40 (s, 1 H), 7.87 (d, *J*=1.41 Hz, 2 H), 7.62 - 7.66 (m, 4 H), 7.53 - 7.59 (m, 4 H), 7.43 - 7.50 (m, 10 H), 5.49 (s, 4 H).

### Scheme 1 : Synthesis of (4-Phenylethynyl)benzyl bromide

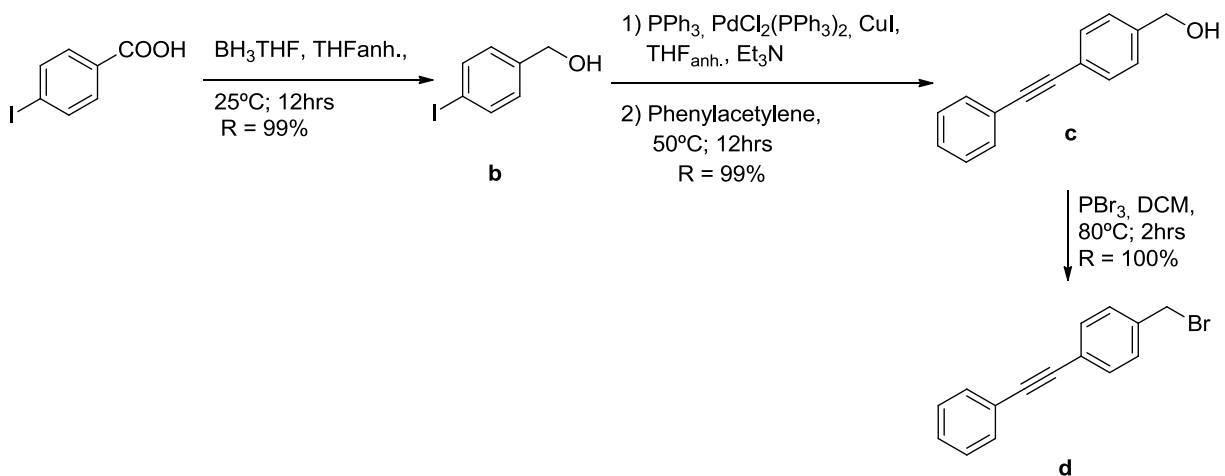

### Scheme 2 : Synthesis of (*N,N'*-Diphenylethynylbenzyl)imidazolium bromide (1)

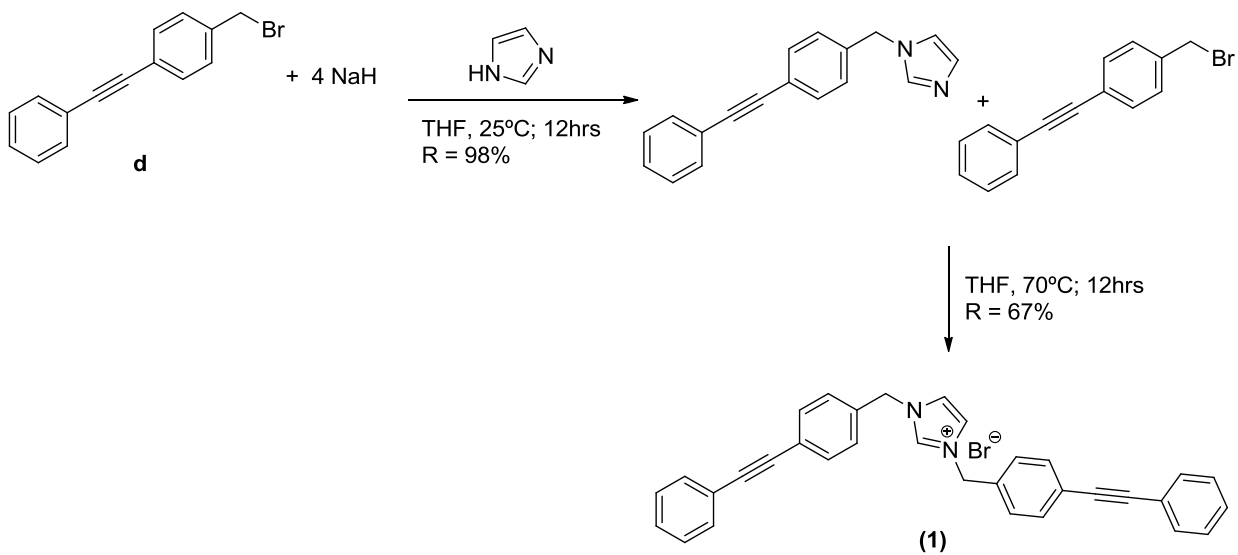

**Scheme 3.** : Counter anion change of **1** in order to obtain compounds **2-4**

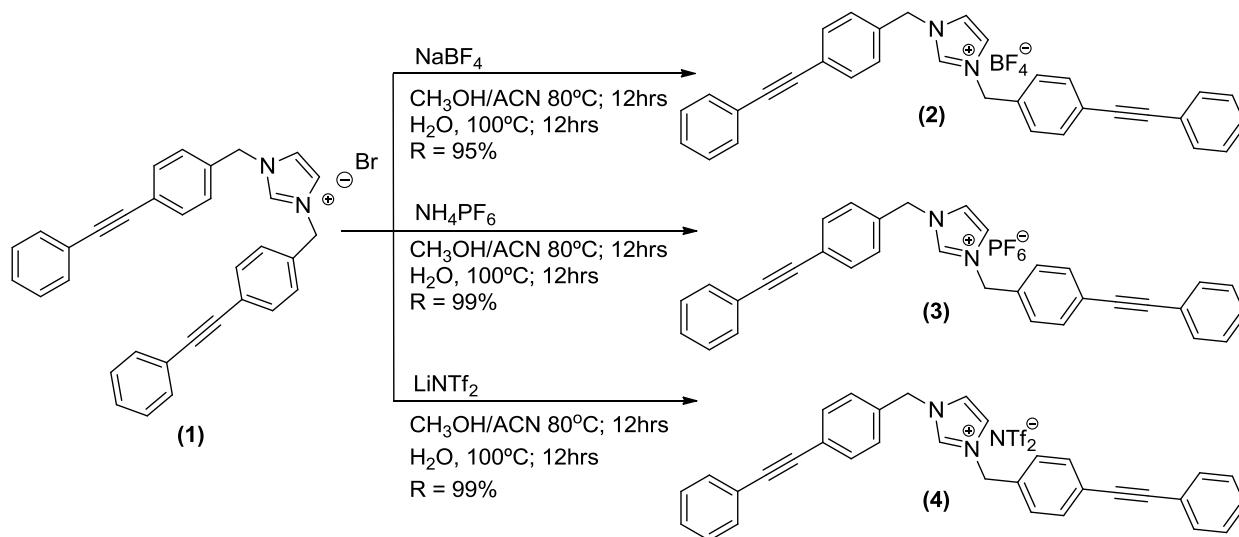

**Preparation of EYPC liposomes for Lucigenin-based assays.** A stock solution of egg-yolk phosphatidylcholine (EYPC) in  $\text{CHCl}_3$  (100 mg) was evaporated under reduced pressure on the water bath rt to produce a thin film that was dried *in vacuo* for 2 h at  $35^\circ\text{C}$ . This lipid film was hydrated with 1 mL of 10 mM sodium phosphate (pH =6,4) containing sodium chloride,  $[\text{NaCl}] = 100 \text{ mM}$ , and 2 mM Lucigenin<sup>1</sup>. Freeze/thaw cycles were repeated at least 10 times until no solid particles were visible. The frozen solution was warmed to  $30\text{-}35^\circ\text{C}$  before every freeze cycle. The mixture was also placed on a vortexer 3 times for 1 min to facilitate hydration. The cloudy solution was extruded through a 100 nm polycarbonate membrane at least 20 times until the solution was transparent. This solution was passed down a Sephadex G-25 column (15 cm x 1 cm) to remove extravesicular lucigenin dye. The eluant was free of lucigenin and contained 10 mM phosphate buffer and 75 mM  $\text{Na}_2\text{SO}_4$ . The 2,6 mL of solution isolated from gel filtration was 50 mM in lipid, assuming all EYPC was incorporated into the liposomes. Each stock solution of liposomes was used that same day for any ion transport assays.

**Preparation of DPPC liposomes for Lucigenin-based assays.** DPPC lipid (50 mg) was dissolved in 5 mL of a chloroform/methanol mixture (5 % MeOH), and the resulting solution was then evaporated under reduced pressure at 45°C to produce a thin film that was then dried *in vacuo* for 2 h. The lipid film was hydrated with 1 mL of 10 mM sodium phosphate containing sodium chloride, [NaCl] = 100 mM, and 2 mM Lucigenin. After 10 freeze/thaw cycles (thawing, and then warming to 45°C) the liposomes were extruded through a 100 nm polycarbonate membrane 21 times at temperature between 45-55°C (fluid state lipid). This solution was passed down a Sephadex G-25 column (15 cm x 1 cm) to remove extravascular lucigenin dye. The eluant was free of lucigenin and contained 10 mM phosphate buffer and 75 mM Na<sub>2</sub>SO<sub>4</sub>. The 2,6 mL of solution isolated from gel filtration was 26,2 mM in lipid, assuming all DPPC was incorporated into the liposomes. Each stock solution of liposomes was used that same day for any ion transport assays.

**Lucigenin-based ion transport assays.** A 20 µL aliquot of the stock solution of liposomes was added to a cuvette containing 2 mL of a solution of salt NaNO<sub>3</sub> and 10 mM phosphate buffer to give a 0.25 – 0.3 mM solution of phospholipid. The fluorescence of intravesicular dye was monitored by excitation at 372 nm and the emission at 503 nm was recorded. For assays in EYPC liposomes, some time within the first 100 s of the experiment, an 400 µL aliquot of a 0,25 mM solution of imidazoliums **1**, **2**, **3** and **4** in MeOH was injected to give a solution that was less than 0,025 mM in imidazolium. At the end of the experiment, 10% aqueous Triton-X was injected to lyse the liposomes. The temperature was set to 37 °C. For kinetic analysis in EYPC liposomes, some time within the first 100 s of the experiment, nine 400 µL aliquots of 0,0215 mM to 0,75 mM solutions of imidazolium **4** in MeOH was injected to give solutions that were 0,004 mM to 0,123 mM in imidazolium respectively. The temperature was set to 37 °C. For assays in DPPC liposomes, some time within the first 100 s of the experiment, an 400 µL aliquot of a 0,25 mM solution of imidazolium **4** in MeOH was injected to give a solution that was less than 0,025 mM in imidazolium. The temperature was set to 25°C, 30°C, 35°C, 40°C, 45°C successively.



**Preparation of liposomes for HPTS-based assays.** A stock solution of egg-yolk phosphatidylcholine (EYPC) in  $\text{CHCl}_3$  (100 mg) was evaporated on the water bath at room temperature under reduced pressure to produce a thin film that was dried *in vacuo* for 2 h at 35 °C. This lipid film was hydrated with 1 mL of 10 mM sodium phosphate containing sodium perchlorate,  $[\text{NaClO}_4] = 100 \text{ mM}$ , and 0.1 mM HPTS. Freeze/thaw cycles were repeated at least 10 times until no solid particles were visible. The frozen solution was warmed to 30-35 °C before every freeze cycle. The mixture was also placed on a vortexer 3 times for 1 min to facilitate hydration. The cloudy solution was extruded through a 100 nm polycarbonate membrane at least 20 times until the solution was transparent. This solution was passed down a Sephadex G-25 column (11 cm x 1 cm) to remove extravesicular HPTS dye. The eluant was identical to the solution used to hydrate the EYPC films except that it was free of HPTS. The 2.6 mL of solution isolated from gel filtration was 50 mM in lipid, assuming all EYPC was incorporated into the liposomes. Each stock solution of liposomes was used that same day for any ion transport assays.

**HPTS-based ion transport assays.** This procedure describes the typical ion transport assay. A 20  $\mu\text{L}$  aliquot of the stock solution of EYPC liposomes was added to a cuvette containing 2 mL of a solution of salt  $\text{NaNO}_3$ ,  $\text{NaCl}$  or  $\text{NaSO}_4$  and 10 mM phosphate buffer to give a 0.25–0.3 mM solution of phospholipid. The fluorescence of intravesicular HPTS was monitored by excitation at both 403 nm and 460 nm and the emission at 510 nm was recorded. Some time within the first 5 min of the experiment, a 70- $\mu\text{L}$  aliquot of a 1.5 mM solution of imidazolium **4** was injected to give a solution that was 0.0525 mM in amphiphile. At the end of the experiment (25 min), 10% aqueous Triton-X was injected to lyse the liposomes. The temperature was set to 37°C.

### Initial rate and the rate constant calculations

Fluorescence assays were run at three different III/EYPC ratios: 1/10, 1/50 and 1/100. The initial rate were determined at  $t=50$ s when the transporter is injected, following the Stern-Volmer equation<sup>20</sup>.

$$\left(\frac{F_0}{F}\right) = 1 + K_{SV}[\text{Cl}^-]$$

with  $F_0$  : maximum fluorescence intensity in absence of quencher  
 $F$  : fluorescence intensity  
 $K_{SV}$  : Stern-Volmer constant, here  $K_{SV} = 142\text{M}^{-1}$   
 $[\text{Cl}^-]$  : intravesicular chloride concentration

From this equation, we can deduce:

$$\text{At } t=0, \quad -\left(\frac{d[\text{Cl}^-]}{dt}\right) = \left(\frac{F_0}{K_{SV}}\right) \cdot \left(\frac{1}{F^2}\right) \cdot \left(\frac{dF}{dt}\right)_{t=0} = V_0$$

With  $V_0$  : initial rate

According to equation 4 (see the article), the initial rate of ion flow ( $V_0$ ) is expected to have a dependence on the pseudo first ordre constant ( $k_{obsd}$ ) and  $[\text{Cl}^-]$  the total initial intravesicular chloride concentration (48mM).

$$V_0 = k_{obsd} [\text{Cl}^-]_{t=0}$$

**Table S1. Determination of  $V_0$  and  $k_{obsd}$  at different 4/EYPC ratios**

| mol% 4/EYPC | [ 4 ] (mM) | (dF/dt) ( $s^{-1}$ ) | $V_0$ (mM/s) | $V_0$ average (mM/s) | $K_{obsd}$ ( $s^{-1}$ ) | Standard deviation |
|-------------|------------|----------------------|--------------|----------------------|-------------------------|--------------------|
| 1,0         | 0,004      | 0,019                | 0,242        | 0,192                | 0,004                   | 9,45E-04           |
|             |            | 0,014                | 0,181        |                      |                         |                    |
|             |            | 0,012                | 0,153        |                      |                         |                    |
| 1,7         | 0,007      | 0,024                | 0,310        | 0,353                | 0,007                   | 1,42E-03           |
|             |            | 0,034                | 0,431        |                      |                         |                    |
|             |            | 0,025                | 0,317        |                      |                         |                    |
| 3,4         | 0,014      | 0,040                | 0,509        | 0,641                | 0,013                   | 3,32E-03           |
|             |            | 0,047                | 0,598        |                      |                         |                    |
|             |            | 0,064                | 0,818        |                      |                         |                    |
| 6,9         | 0,028      | 0,158                | 2,017        | 1,664                | 0,035                   | 6,57E-03           |
|             |            | 0,122                | 1,562        |                      |                         |                    |
|             |            | 0,110                | 1,411        |                      |                         |                    |
| 8,6         | 0,035      | 0,105                | 1,344        | 1,535                | 0,032                   | 4,07E-03           |
|             |            | 0,136                | 1,734        |                      |                         |                    |
|             |            | 0,119                | 1,526        |                      |                         |                    |
| 14,0        | 0,057      | 0,178                | 2,278        | 2,480                | 0,052                   | 4,58E-03           |
|             |            | 0,212                | 2,714        |                      |                         |                    |
|             |            | 0,192                | 2,448        |                      |                         |                    |
| 18,0        | 0,074      | 0,299                | 3,822        | 3,279                | 0,068                   | 9,82E-03           |
|             |            | 0,233                | 2,975        |                      |                         |                    |
|             |            | 0,238                | 3,041        |                      |                         |                    |
| 25,0        | 0,102      | 0,540                | 6,901        | 5,577                | 0,116                   | 3,66E-02           |
|             |            | 0,281                | 3,584        |                      |                         |                    |
|             |            | 0,489                | 6,247        |                      |                         |                    |
| 30,0        | 0,123      | 0,442                | 5,642        | 5,363                | 0,112                   | 2,29E-02           |
|             |            | 0,493                | 6,295        |                      |                         |                    |
|             |            | 0,325                | 4,151        |                      |                         |                    |

**Table S2. Determination of activity of 4 at different 4/EYPC ratios**

| mol% 4/EYPC | Log(mol% 4/EYPC) | % of Rmax at 250 s | Average % of Rmax at 250 s | Standard deviation |
|-------------|------------------|--------------------|----------------------------|--------------------|
| 1,0         | 0,0000           | 23,98              | 24,32                      | 0,48               |
|             |                  | 24,87              |                            |                    |
|             |                  | 24,12              |                            |                    |
| 1,7         | 0,2304           | 35,14              | 37,64                      | 2,98               |
|             |                  | 40,93              |                            |                    |
|             |                  | 36,85              |                            |                    |
| 3,4         | 0,5315           | 48,21              | 51,39                      | 3,82               |
|             |                  | 50,34              |                            |                    |
|             |                  | 55,62              |                            |                    |
| 6,9         | 0,8388           | 90,14              | 85,55                      | 5,20               |
|             |                  | 86,60              |                            |                    |
|             |                  | 79,91              |                            |                    |
| 8,6         | 0,9345           | 87,29              | 86,50                      | 2,69               |
|             |                  | 83,51              |                            |                    |
|             |                  | 88,71              |                            |                    |
| 14,0        | 1,1461           | 92,51              | 90,17                      | 3,30               |
|             |                  | 87,84              |                            |                    |
|             |                  | 91,77              |                            |                    |
| 18,0        | 1,2553           | 100,20             | 97,42                      | 2,64               |
|             |                  | 97,11              |                            |                    |
|             |                  | 94,94              |                            |                    |
| 25,0        | 1,3979           | 100,00             | 99,23                      | 0,71               |
|             |                  | 98,60              |                            |                    |
|             |                  | 99,09              |                            |                    |
| 30,0        | 1,4771           | 97,06              | 99,11                      | 2,75               |
|             |                  | 102,23             |                            |                    |
|             |                  | 98,04              |                            |                    |

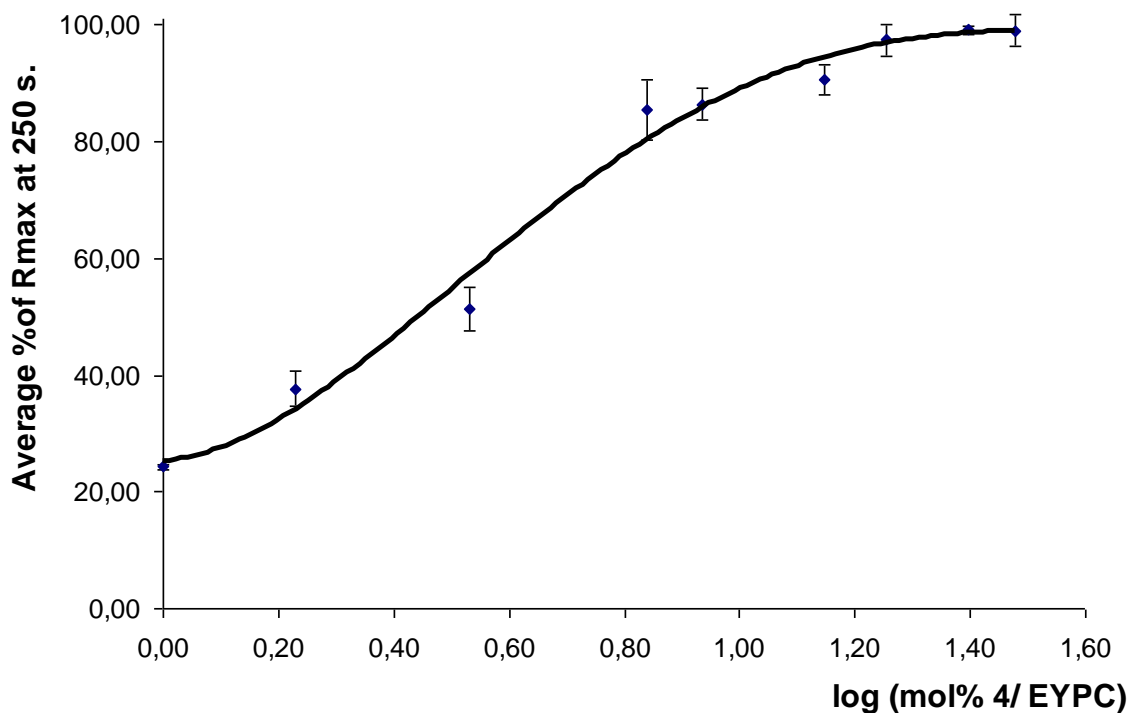

**Figure S1\_** Dose response curve for determination of the  $EC_{50}$  for imidazolium **4**. The data at each mol% is the average of 3 runs, with the standard deviation. The  $\text{Log}(\text{mol}\% \text{ 4/EYPC})$  that provokes a response half way between the baseline (24,32%) and maximum response (99,23%) has a value of 0,75. This corresponds to a mol% **4**/EYPC of 5,74%.
